# Supplementary material
Source: PubMed Central journal article supplement (PMC10311422)
Supplement: jama-e2312034-s001.pdf [file jama-e2312034-s001.pdf]

## Data Sharing Statement

Bell. Texas' 2021 Ban on Abortion in Early Pregnancy and Changes in Live Births. *JAMA*.  
Published June 29, 2023. doi:10.1001/jama.2023.12034

### Data

**Data available:** Yes

**Data types:** Other (please specify)

**Additional Information:** Data are aggregate birth counts by state and do not include any individual data.

**How to access data:** Data for 2016-2021 are publicly available via CDC

Wonder(<https://wonder.cdc.gov/natality-expanded-current.html>) and data for 2022 are provision

birth counts available via the National Center for Health Statistics

(<https://www.cdc.gov/nchs/nvss/vsrr/provisional-tables.htm>).

**When available:** beginning date: 04-01-2023

### Supporting Documents

**Document types:** None

### Additional Information

**Who can access the data:** Data are already publicly available via CDC Wonder and NCHS.

**Types of analyses:** They are available for any purpose.

**Mechanisms of data availability:** Data are available upon request from CDC Wonder and NCHS without investigator support.
